# Supplementary material
Source: publisher figshare collection journal article supplement (https://diabetesjournals.figshare.com/ndownloader/files/22521143)

## Real-world budget impact of the adoption of insulin glargine biosimilars in primary care in England (2015-2018)

### Supplemental material

Figure S1 Market shares of insulin glargine products in primary care in England

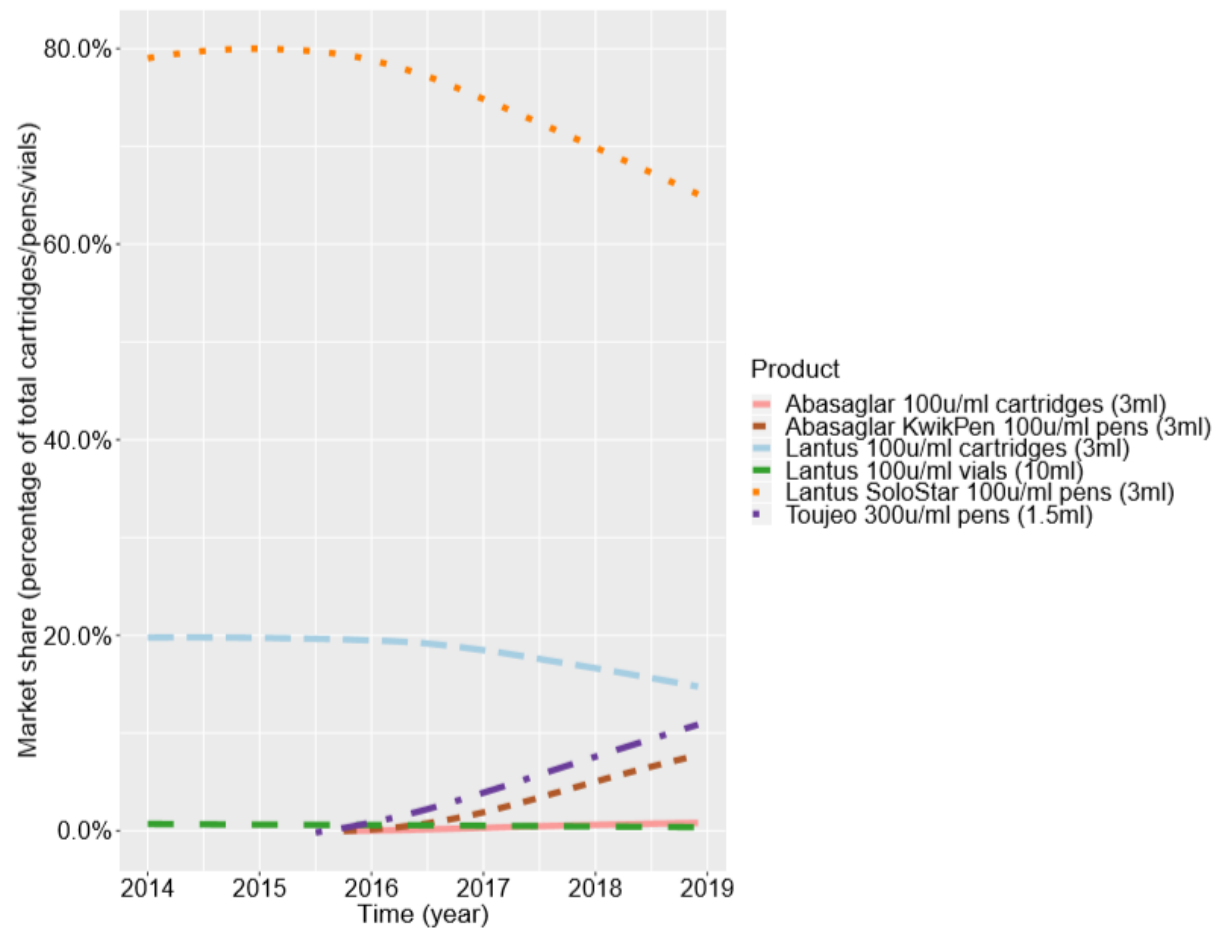

**Figure S2 Actual cost of insulin glargine products in primary care in England**

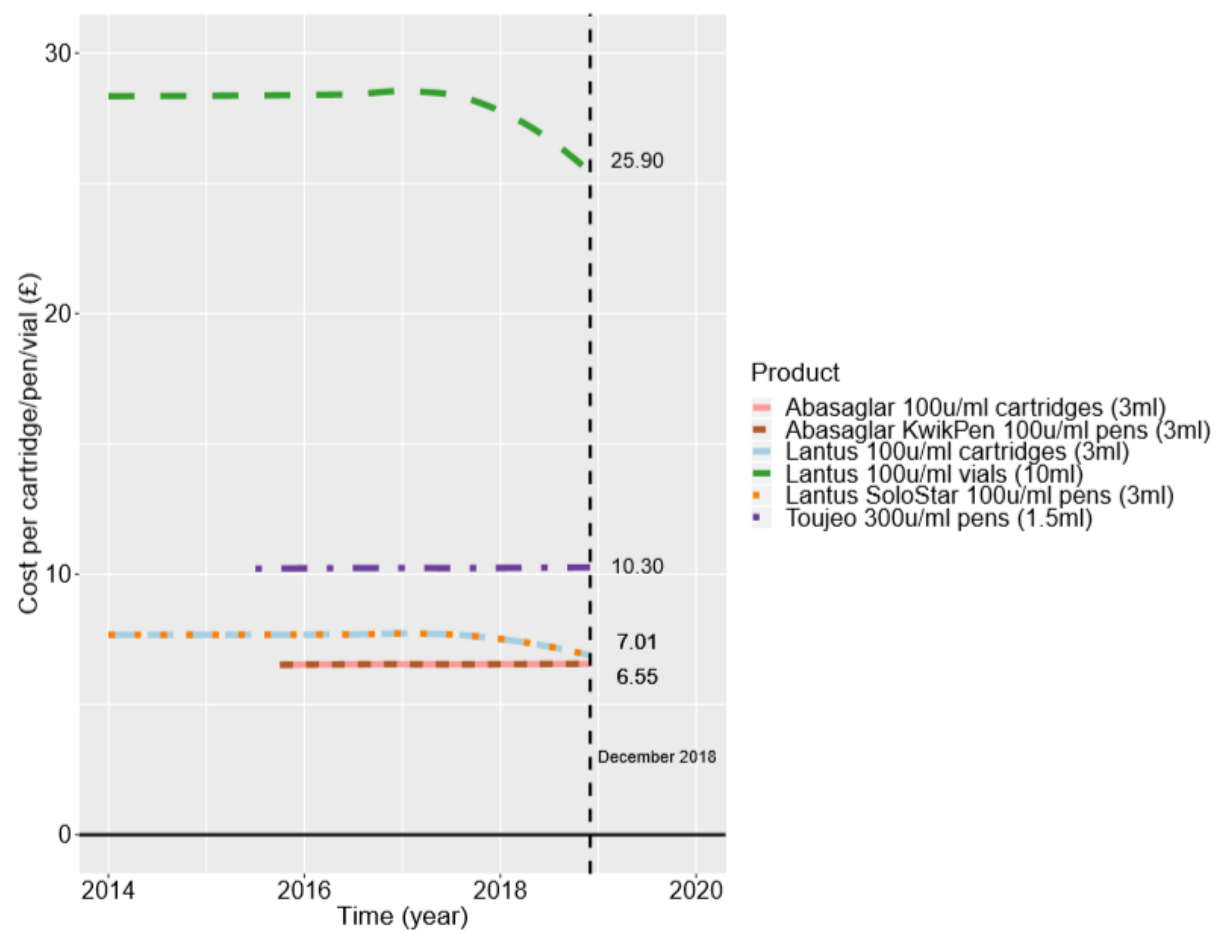

**Figure S3 Market share of Abasaglar KwikPen®, from the total 3-ml pre-filled pen prescriptions, in December 2015**

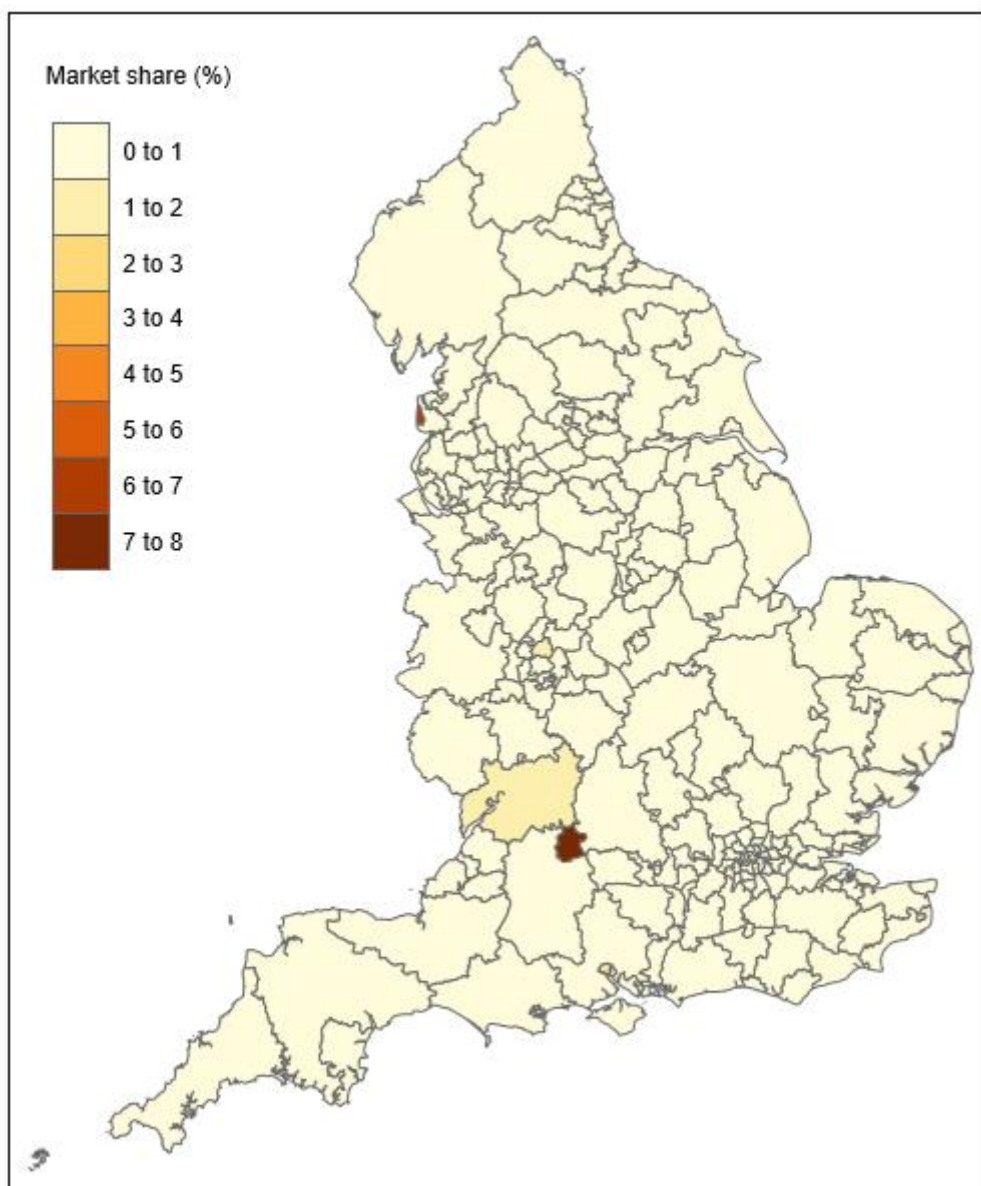

**Figure S4 Market share of Abasaglar KwikPen®, from the total 3-ml pre-filled pen prescriptions, in December 2016**

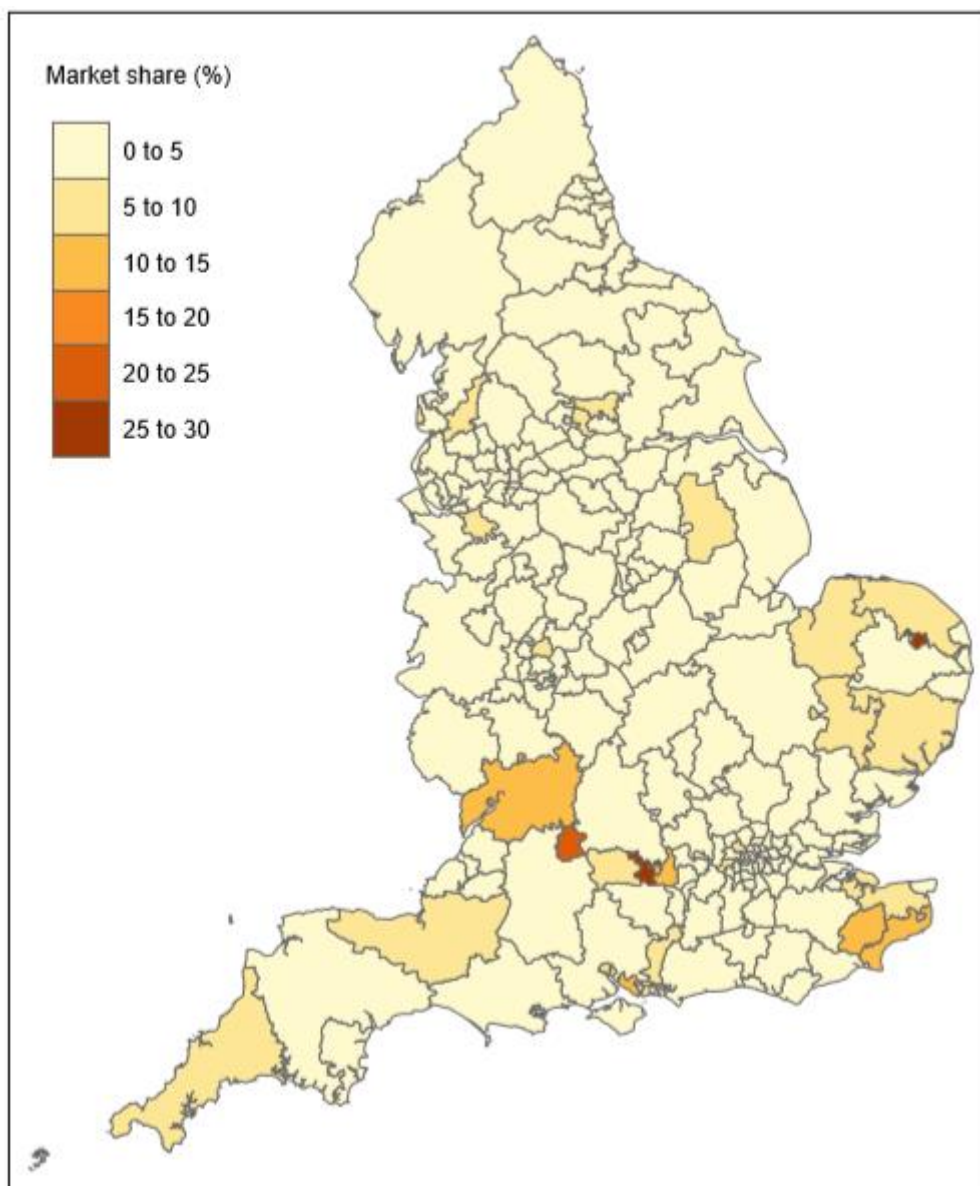

**Figure S5 Market share of Abasaglar KwikPen®, from the total 3-ml pre-filled pen prescriptions, in December 2017**

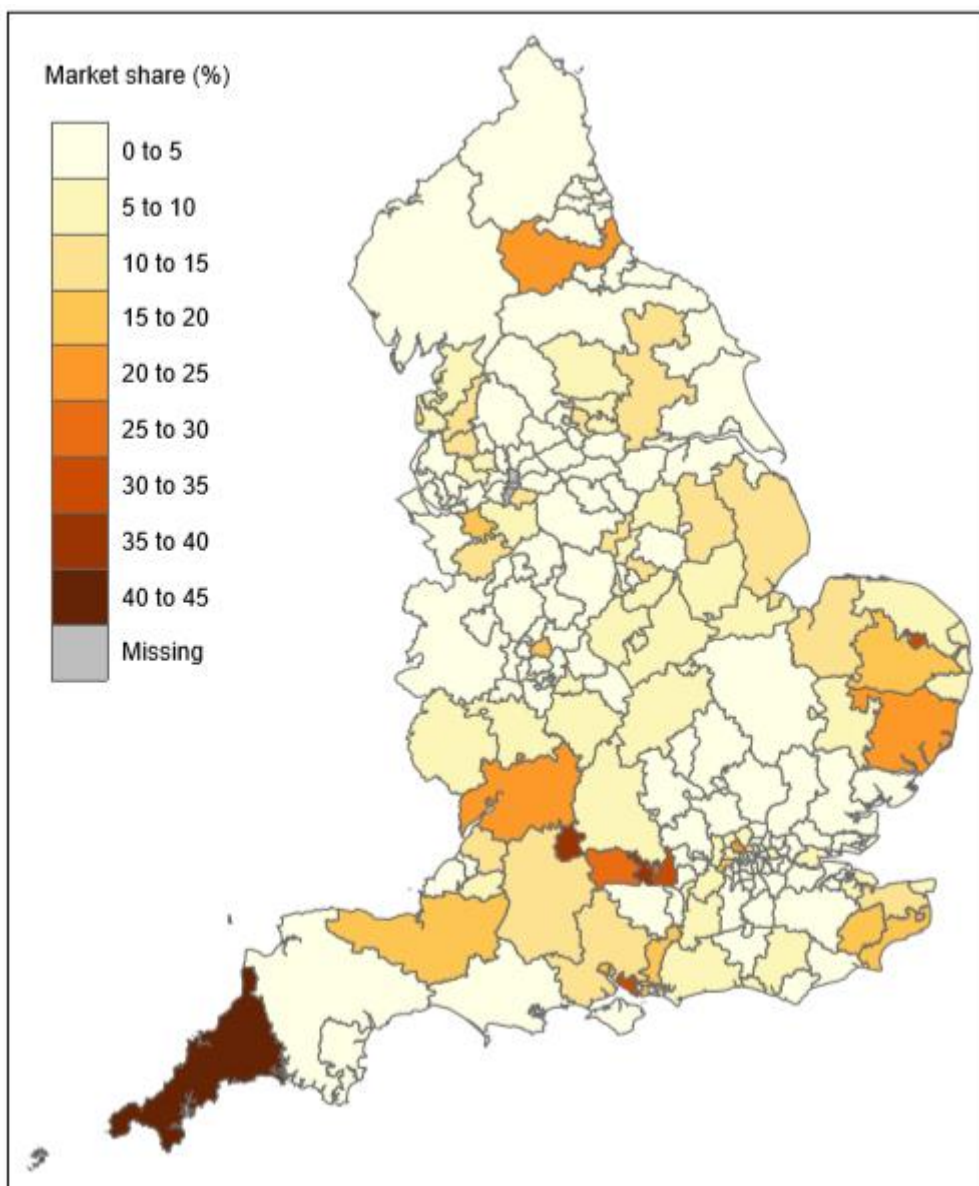

Supplement: Supplementary file 1 [file 22521143]
